# Supplementary material
Source: MDPI journal article supplement (https://www.mdpi.com/1424-8247/16/4/516)
Supplement: s1 [file s1]

# Supporting Information For:

## Antibacterial Properties and Computational Insights of Potent Novel Linezolid-Based Oxazolidinones

M. Shaheer Malik <sup>1,\*†</sup>, Shaikh Faazil <sup>2,3,†</sup>, Meshari A. Alsharif <sup>1</sup>, Qazi Mohammad Sajid Jamal <sup>4</sup>, Jabir H. Al-Fahemi <sup>1</sup>, Amrita Banerjee <sup>5,6</sup>, Arpita Chattopadhyay <sup>7</sup>, Samir Kumar Pal <sup>8</sup>, Ahmed Kamal <sup>3,9,\*</sup> and Saleh A. Ahmed <sup>1,10,\*</sup>

<sup>1</sup> Department of Chemistry, Faculty of Applied Sciences, Umm Al-Qura University, Makkah 21955, Saudi Arabia; maasharif@uqu.edu.sa (M.A.A.)

<sup>2</sup> Department of Chemistry, Poona College of Arts, Science and Commerce, Pune 411001, India

<sup>3</sup> Department of Medicinal Chemistry and Pharmacology, CSIR—Indian Institute of Chemical Technology, Hyderabad 500007, India

<sup>4</sup> Department of Health Informatics, College of Public Health and Health Informatics, Qassim University, Al Bukayriyah 52741, Saudi Arabia; m.quazi@qu.edu.sa

<sup>5</sup> Department of Physics, Jadavpur University, 188, Raja S.C. Mallick Rd., Kolkata 700032, India; amritabanerjee30@gmail.com

<sup>6</sup> Technical Research Centre, S. N. Bose National Centre for Basic Sciences, Block JD, Sector III, Salt Lake, Kolkata 700106, India

<sup>7</sup> Department of Basic Science and Humanities, Techno International New Town, Block—DG 1/1, Action Area 1, New Town, Rajarhat, Kolkata 700156, India; arpita.chattopadhyay@gmail.com

<sup>8</sup> Department of Chemical and Biological Sciences, S. N. Bose National Centre for Basic Sciences, Block JD, Sector 3, Salt Lake, Kolkata 700106, India; skpal@bose.res.in

<sup>9</sup> Department of Pharmacy, Birla Institute of Technology and Science-Pilani, Hyderabad 500078, India

<sup>10</sup> Chemistry Department, Faculty of Science, Assiut University, Assiut 71516, Egypt

\* Correspondence: msmalik@uqu.edu.sa (M.S.M.); ahmedkamal@iict.res.in (A.K.); saahmed@uqu.edu.sa (S.A.A.)

† These authors contributed equally to this work.

**Keywords:** Oxazolidinone, Linezolid, antibacterial, molecular modeling, molecular dynamics, ADME properties

### Contents:

- **Table S1:** Physicochemical properties of compounds **2**, **3a-j**, **4a-j** and linezolid (control)
- **Table S2:** Lipophilicity and water solubility of compounds **2**, **3a-j**, **4a-j** and linezolid (control)
- **Table S3:** Some other water solubility parameters of compounds **2**, **3a-j**, **4a-j** and linezolid (control)
- **Table S4:** Pharmacokinetics parameters of compounds **2**, **3a-j**, **4a-j** and linezolid (control)
- **Table S5:** Drug likeness and medicinal chemistry of compounds **2**, **3a-j**, **4a-j** and linezolid (control)
- **Table S6:** Toxicity of compounds **2**, **3a-j**, **4a-j** and linezolid (control)

**Table S1.** Physicochemical properties of compounds **2**, **3a-j**, **4a-j** and linezolid (control).

| Molecule  | #Heavy atoms | #Aromatic heavy atoms | Fraction Csp <sup>3</sup> | #Rotatable bonds | #H-bond acceptors | #H-bond donors | MR     | TPSA   |
|-----------|--------------|-----------------------|---------------------------|------------------|-------------------|----------------|--------|--------|
| 2         | 38           | 11                    | 0.46                      | 10               | 9                 | 1              | 143.52 | 150.38 |
| 3a        | 35           | 11                    | 0.4                       | 8                | 10                | 1              | 131.55 | 166.6  |
| 3b        | 41           | 17                    | 0.31                      | 9                | 10                | 1              | 155.36 | 166.6  |
| 3c        | 43           | 17                    | 0.3                       | 10               | 11                | 1              | 160.58 | 183.67 |
| 3d        | 44           | 17                    | 0.31                      | 10               | 13                | 1              | 155.39 | 166.6  |
| 3e        | 42           | 17                    | 0.31                      | 10               | 11                | 1              | 156.88 | 175.83 |
| 3f        | 41           | 17                    | 0.28                      | 9                | 10                | 1              | 155.4  | 166.6  |
| 3g        | 41           | 17                    | 0.28                      | 9                | 11                | 1              | 150.35 | 166.6  |
| 3h        | 42           | 17                    | 0.28                      | 9                | 12                | 1              | 150.31 | 166.6  |
| 3i        | 42           | 17                    | 0.28                      | 9                | 12                | 1              | 150.31 | 166.6  |
| 3j        | 44           | 21                    | 0.25                      | 9                | 11                | 1              | 165.69 | 179.49 |
| 4a        | 37           | 18                    | 0.24                      | 8                | 4                 | 1              | 152.46 | 87.18  |
| 4b        | 32           | 15                    | 0.3                       | 6                | 5                 | 1              | 127.24 | 100.32 |
| 4c        | 29           | 12                    | 0.37                      | 6                | 6                 | 1              | 113.06 | 112.96 |
| 4d        | 34           | 15                    | 0.33                      | 6                | 4                 | 1              | 142.83 | 115.42 |
| 4e        | 37           | 17                    | 0.26                      | 8                | 5                 | 1              | 149.89 | 100.32 |
| 4f        | 36           | 6                     | 0.62                      | 9                | 6                 | 1              | 149.63 | 119.96 |
| 4g        | 43           | 6                     | 0.66                      | 12               | 8                 | 1              | 174.6  | 124.2  |
| 4h        | 36           | 12                    | 0.46                      | 9                | 8                 | 1              | 138.02 | 117.2  |
| 4i        | 40           | 15                    | 0.41                      | 9                | 6                 | 2              | 159.26 | 107.21 |
| 4j        | 37           | 12                    | 0.44                      | 9                | 7                 | 1              | 145.24 | 104.31 |
| Linezolid | 24           | 6                     | 0.5                       | 5                | 5                 | 1              | 91.06  | 71.11  |

**Table S2.** Lipophilicity and water solubility of compounds **2**, **3a-j**, **4a-j** and linezolid (control).

| Molecule  | iLOGP | XLOGP3 | WLOGP | MLOGP | Silicos-IT Log P | Consensus Log P | ESOL Log S | ESOL Solubility (mg/ml) | ESOL Solubility (mol/l) |
|-----------|-------|--------|-------|-------|------------------|-----------------|------------|-------------------------|-------------------------|
| 2         | 3.53  | 2.94   | 2.42  | 1.67  | -0.48            | 2.02            | -4.55      | 1.49E-02                | 2.79E-05                |
| 3a        | 2.45  | 1.34   | 1.52  | 0.34  | -1.99            | 0.73            | -3.56      | 1.41E-01                | 2.75E-04                |
| 3b        | 3.4   | 3.27   | 3.26  | 1.39  | -0.46            | 2.17            | -5.26      | 3.26E-03                | 5.55E-06                |
| 3c        | 2.74  | 2.58   | 3.15  | 0.78  | -0.5             | 1.75            | -4.91      | 7.49E-03                | 1.22E-05                |
| 3d        | 3.08  | 3.78   | 5.12  | 1.69  | 0.12             | 2.76            | -5.82      | 9.60E-04                | 1.50E-06                |
| 3e        | 3.2   | 2.87   | 2.96  | 0.92  | -0.91            | 1.81            | -5.03      | 5.64E-03                | 9.34E-06                |
| 3f        | 3.34  | 3.53   | 3.61  | 1.66  | -0.34            | 2.36            | -5.55      | 1.73E-03                | 2.84E-06                |
| 3g        | 2.77  | 3      | 3.51  | 1.56  | -0.56            | 2.06            | -5.11      | 4.59E-03                | 7.76E-06                |
| 3h        | 2.83  | 3.1    | 4.07  | 1.93  | -0.13            | 2.36            | -5.28      | 3.22E-03                | 5.28E-06                |
| 3i        | 3.04  | 3.1    | 4.07  | 1.93  | -0.13            | 2.4             | -5.28      | 3.22E-03                | 5.28E-06                |
| 3j        | 2.81  | 3.17   | 3.5   | 1.14  | -0.57            | 2.01            | -5.47      | 2.12E-03                | 3.40E-06                |
| 4a        | 4.18  | 5.21   | 4.61  | 4.04  | 4.71             | 4.55            | -6.16      | 3.55E-04                | 6.86E-07                |
| 4b        | 3.22  | 3.55   | 3.54  | 2.71  | 3.23             | 3.25            | -4.85      | 6.41E-03                | 1.41E-05                |
| 4c        | 2.53  | 1.34   | 1.58  | 0.93  | 1.73             | 1.62            | -3.18      | 2.74E-01                | 6.57E-04                |
| 4d        | 4.2   | 5.49   | 4.97  | 4.2   | 5.64             | 4.9             | -6.45      | 1.83E-04                | 3.52E-07                |
| 4e        | 4.32  | 4.96   | 5     | 3.35  | 5.02             | 4.53            | -6.14      | 3.95E-04                | 7.29E-07                |
| 4f        | 3.46  | 2.16   | 1.86  | 2.39  | 1.17             | 2.21            | -3.98      | 5.53E-02                | 1.06E-04                |
| 4g        | 5.33  | 2.39   | 1.99  | 2.26  | 0.66             | 2.53            | -4.42      | 2.32E-02                | 3.82E-05                |
| 4h        | 3.27  | 1.57   | 1.71  | 0.85  | 1.13             | 1.71            | -3.59      | 1.30E-01                | 2.60E-04                |
| 4i        | 4.02  | 4.21   | 3.71  | 2.73  | 3.33             | 3.6             | -5.6       | 1.40E-03                | 2.54E-06                |
| 4j        | 3.25  | 3.27   | 2.96  | 2.29  | 2.35             | 2.82            | -4.86      | 7.43E-03                | 1.39E-05                |
| Linezolid | 2.58  | 0.69   | 0.78  | 0.99  | 1.25             | 1.26            | -2.22      | 2.03E+00                | 6.01E-03                |

**Table S3.** Some other water solubility parameters of compounds **2**, **3a-j**, **4a-j** and linezolid (control).

| Molecule  | ESOL Class         | Ali Log S | Ali Solubility (mg/ml) | Ali Solubility (mol/l) | Ali Class          | Silicos-IT LogSw | Silicos-IT Solubility (mg/ml) | Silicos-IT Solubility (mol/l) | Silicos-IT class   |
|-----------|--------------------|-----------|------------------------|------------------------|--------------------|------------------|-------------------------------|-------------------------------|--------------------|
| <b>2</b>  | Moderately soluble | -5.76     | 9.27E-04               | 1.74E-06               | Moderately soluble | -4.22            | 3.21E-02                      | 6.01E-05                      | Moderately soluble |
| <b>3a</b> | Soluble            | -4.44     | 1.86E-02               | 3.63E-05               | Moderately soluble | -3.66            | 1.12E-01                      | 2.18E-04                      | Soluble            |
| <b>3b</b> | Moderately soluble | -6.44     | 2.12E-04               | 3.61E-07               | Poorly soluble     | -6.08            | 4.85E-04                      | 8.26E-07                      | Poorly soluble     |
| <b>3c</b> | Moderately soluble | -6.09     | 5.06E-04               | 8.21E-07               | Poorly soluble     | -5.99            | 6.24E-04                      | 1.01E-06                      | Moderately soluble |
| <b>3d</b> | Moderately soluble | -6.97     | 6.84E-05               | 1.07E-07               | Poorly soluble     | -6.51            | 1.99E-04                      | 3.10E-07                      | Poorly soluble     |
| <b>3e</b> | Moderately soluble | -6.22     | 3.62E-04               | 6.00E-07               | Poorly soluble     | -5.8             | 9.52E-04                      | 1.58E-06                      | Moderately soluble |
| <b>3f</b> | Moderately soluble | -6.71     | 1.18E-04               | 1.94E-07               | Poorly soluble     | -6.29            | 3.15E-04                      | 5.19E-07                      | Poorly soluble     |
| <b>3g</b> | Moderately soluble | -6.16     | 4.07E-04               | 6.87E-07               | Poorly soluble     | -5.97            | 6.34E-04                      | 1.07E-06                      | Moderately soluble |
| <b>3h</b> | Moderately soluble | -6.27     | 3.30E-04               | 5.41E-07               | Poorly soluble     | -6.22            | 3.63E-04                      | 5.96E-07                      | Poorly soluble     |
| <b>3i</b> | Moderately soluble | -6.27     | 3.30E-04               | 5.41E-07               | Poorly soluble     | -6.22            | 3.63E-04                      | 5.96E-07                      | Poorly soluble     |
| <b>3j</b> | Moderately soluble | -6.61     | 1.53E-04               | 2.45E-07               | Poorly soluble     | -6.95            | 7.02E-05                      | 1.12E-07                      | Poorly soluble     |
| <b>4a</b> | Poorly soluble     | -6.79     | 8.43E-05               | 1.63E-07               | Poorly soluble     | -8.13            | 3.85E-06                      | 7.45E-09                      | Poorly soluble     |
| <b>4b</b> | Moderately soluble | -5.34     | 2.07E-03               | 4.55E-06               | Moderately soluble | -6.48            | 1.51E-04                      | 3.32E-07                      | Poorly soluble     |
| <b>4c</b> | Soluble            | -3.31     | 2.03E-01               | 4.85E-04               | Soluble            | -4.88            | 5.48E-03                      | 1.31E-05                      | Moderately soluble |
| <b>4d</b> | Poorly soluble     | -7.67     | 1.11E-05               | 2.13E-08               | Poorly soluble     | -7.47            | 1.77E-05                      | 3.41E-08                      | Poorly soluble     |
| <b>4e</b> | Poorly soluble     | -6.8      | 8.49E-05               | 1.57E-07               | Poorly soluble     | -7.93            | 6.38E-06                      | 1.18E-08                      | Poorly soluble     |
| <b>4f</b> | Soluble            | -4.31     | 2.55E-02               | 4.88E-05               | Moderately soluble | -3.68            | 1.10E-01                      | 2.09E-04                      | Soluble            |
| <b>4g</b> | Moderately soluble | -4.64     | 1.39E-02               | 2.29E-05               | Moderately soluble | -3.7             | 1.21E-01                      | 2.00E-04                      | Soluble            |
| <b>4h</b> | Soluble            | -3.64     | 1.14E-01               | 2.28E-04               | Soluble            | -4.92            | 5.99E-03                      | 1.20E-05                      | Moderately soluble |
| <b>4i</b> | Moderately soluble | -6.17     | 3.72E-04               | 6.74E-07               | Poorly soluble     | -6.88            | 7.29E-05                      | 1.32E-07                      | Poorly soluble     |
| <b>4j</b> | Moderately soluble | -5.13     | 3.91E-03               | 7.33E-06               | Moderately soluble | -5.87            | 7.19E-04                      | 1.35E-06                      | Moderately soluble |
| Linezolid | Soluble            | -1.76     | 5.86E+00               | 1.74E-02               | Very soluble       | -3.19            | 2.18E-01                      | 6.47E-04                      | Soluble            |

**Table S4.** Pharmacokinetics parameters of compounds **2**, **3a-j**, **4a-j** and linezolid (control).

| Molecule  | GI absorption | BBB permeant | Pgp substrate | CYP1A2 inhibitor | CYP2C19 inhibitor | CYP2C9 inhibitor | CYP2D6 inhibitor | CYP3A4 inhibitor | -log Kp (cm/s) |
|-----------|---------------|--------------|---------------|------------------|-------------------|------------------|------------------|------------------|----------------|
| <b>2</b>  | Low           | No           | Yes           | No               | Yes               | Yes              | No               | Yes              | -7.47          |
| <b>3a</b> | Low           | No           | Yes           | No               | Yes               | Yes              | No               | Yes              | -8.47          |
| <b>3b</b> | Low           | No           | Yes           | No               | No                | Yes              | No               | Yes              | -7.56          |
| <b>3c</b> | Low           | No           | Yes           | No               | No                | Yes              | No               | Yes              | -8.22          |
| <b>3d</b> | Low           | No           | Yes           | No               | No                | Yes              | No               | Yes              | -7.53          |
| <b>3e</b> | Low           | No           | Yes           | No               | No                | Yes              | No               | Yes              | -7.94          |
| <b>3f</b> | Low           | No           | Yes           | No               | No                | Yes              | No               | Yes              | -7.5           |
| <b>3g</b> | Low           | No           | Yes           | No               | No                | Yes              | No               | Yes              | -7.78          |
| <b>3h</b> | Low           | No           | Yes           | No               | No                | Yes              | No               | Yes              | -7.82          |
| <b>3i</b> | Low           | No           | Yes           | No               | No                | Yes              | No               | Yes              | -7.82          |
| <b>3j</b> | Low           | No           | Yes           | No               | No                | Yes              | No               | Yes              | -7.86          |
| <b>4a</b> | High          | No           | Yes           | No               | Yes               | Yes              | Yes              | Yes              | -5.76          |
| <b>4b</b> | High          | No           | Yes           | Yes              | Yes               | Yes              | Yes              | Yes              | -6.56          |
| <b>4c</b> | High          | No           | Yes           | No               | Yes               | No               | Yes              | Yes              | -7.9           |
| <b>4d</b> | Low           | No           | Yes           | Yes              | Yes               | Yes              | Yes              | Yes              | -5.57          |
| <b>4e</b> | High          | No           | Yes           | No               | Yes               | Yes              | Yes              | Yes              | -6.08          |
| <b>4f</b> | High          | No           | Yes           | No               | Yes               | No               | Yes              | Yes              | -7.96          |
| <b>4g</b> | High          | No           | Yes           | No               | Yes               | Yes              | Yes              | Yes              | -8.3           |
| <b>4h</b> | High          | No           | Yes           | No               | Yes               | Yes              | No               | Yes              | -8.24          |
| <b>4i</b> | High          | No           | Yes           | No               | Yes               | Yes              | Yes              | Yes              | -6.68          |
| <b>4j</b> | High          | No           | Yes           | No               | Yes               | Yes              | Yes              | Yes              | -7.24          |
| Linezolid | High          | No           | Yes           | No               | No                | No               | No               | No               | -7.87          |

**Table S5.** Drug likeness and medicinal chemistry of compounds **2**, **3a-j**, **4a-j** and linezolid (control).

| Molecule  | Lipinski #violations | Ghose #violations | Veber #violations | Egan #violations | Muegge #violations | Bioavailability Score | PAINS #alerts | Brenk #alerts | Leadlikeness #violations | Synthetic accessibility |
|-----------|----------------------|-------------------|-------------------|------------------|--------------------|-----------------------|---------------|---------------|--------------------------|-------------------------|
| <b>2</b>  | 2                    | 2                 | 1                 | 1                | 1                  | 0.17                  | 1             | 3             | 2                        | 4.57                    |
| <b>3a</b> | 2                    | 2                 | 1                 | 1                | 1                  | 0.17                  | 1             | 2             | 2                        | 4.22                    |
| <b>3b</b> | 2                    | 2                 | 1                 | 1                | 1                  | 0.17                  | 1             | 2             | 2                        | 4.63                    |
| <b>3c</b> | 2                    | 2                 | 1                 | 1                | 3                  | 0.17                  | 1             | 2             | 2                        | 4.69                    |
| <b>3d</b> | 2                    | 2                 | 1                 | 1                | 3                  | 0.17                  | 1             | 2             | 3                        | 4.63                    |
| <b>3e</b> | 2                    | 2                 | 1                 | 1                | 3                  | 0.17                  | 1             | 2             | 2                        | 4.63                    |
| <b>3f</b> | 2                    | 2                 | 1                 | 1                | 2                  | 0.17                  | 1             | 2             | 3                        | 4.51                    |
| <b>3g</b> | 2                    | 2                 | 1                 | 1                | 2                  | 0.17                  | 1             | 2             | 2                        | 4.53                    |
| <b>3h</b> | 2                    | 2                 | 1                 | 1                | 3                  | 0.17                  | 1             | 2             | 2                        | 4.56                    |
| <b>3i</b> | 2                    | 2                 | 1                 | 1                | 3                  | 0.17                  | 1             | 2             | 2                        | 4.54                    |

|           |   |   |   |   |   |      |   |   |   |      |
|-----------|---|---|---|---|---|------|---|---|---|------|
| 3j        | 2 | 2 | 1 | 1 | 3 | 0.17 | 1 | 2 | 2 | 4.72 |
| 4a        | 1 | 2 | 0 | 0 | 1 | 0.55 | 1 | 2 | 3 | 4.31 |
| 4b        | 0 | 0 | 0 | 0 | 0 | 0.55 | 1 | 0 | 2 | 3.99 |
| 4c        | 0 | 0 | 0 | 0 | 0 | 0.55 | 1 | 0 | 1 | 3.59 |
| 4d        | 2 | 2 | 0 | 0 | 1 | 0.17 | 1 | 0 | 2 | 4.1  |
| 4e        | 1 | 2 | 0 | 0 | 0 | 0.55 | 1 | 1 | 3 | 4.52 |
| 4f        | 1 | 2 | 0 | 0 | 0 | 0.55 | 1 | 1 | 2 | 4.58 |
| 4g        | 2 | 3 | 1 | 0 | 1 | 0.17 | 1 | 1 | 2 | 5.19 |
| 4h        | 2 | 2 | 0 | 0 | 0 | 0.17 | 1 | 1 | 2 | 4.22 |
| 4i        | 1 | 3 | 0 | 0 | 0 | 0.55 | 1 | 1 | 3 | 4.46 |
| 4j        | 1 | 2 | 0 | 0 | 0 | 0.55 | 1 | 2 | 2 | 4.19 |
| Linezolid | 0 | 0 | 0 | 0 | 0 | 0.55 | 1 | 0 | 0 | 3.32 |

**Table S6.** Toxicity of compounds **2**, **3a-j**, **4a-j** and linezolid (control).

| Molecule  | hERG Blockers | Human Hepatotoxicity | Drug induced liver injury | Ames Toxicity | Rat Oral Acute Toxicity | FDA Maximum Daily Dose | Skin Sensitization | Carcinogenicity | Eye Corrosion | Eye Irritation | Respiratory Toxicity |
|-----------|---------------|----------------------|---------------------------|---------------|-------------------------|------------------------|--------------------|-----------------|---------------|----------------|----------------------|
| 2         | 0.43          | 0.993                | 0.982                     | 0.995         | 0.493                   | 0.249                  | 0.457              | 0.975           | 0.003         | 0.008          | 0.029                |
| 3a        | 0.719         | 0.993                | 0.985                     | 0.998         | 0.371                   | 0.44                   | 0.331              | 0.968           | 0.003         | 0.007          | 0.187                |
| 3b        | 0.817         | 0.992                | 0.99                      | 0.998         | 0.282                   | 0.208                  | 0.18               | 0.963           | 0.003         | 0.007          | 0.146                |
| 3c        | 0.85          | 0.993                | 0.992                     | 0.998         | 0.287                   | 0.216                  | 0.153              | 0.966           | 0.003         | 0.007          | 0.094                |
| 3d        | 0.757         | 0.994                | 0.988                     | 0.993         | 0.363                   | 0.88                   | 0.181              | 0.949           | 0.003         | 0.006          | 0.341                |
| 3e        | 0.855         | 0.994                | 0.99                      | 0.998         | 0.264                   | 0.189                  | 0.157              | 0.961           | 0.003         | 0.007          | 0.155                |
| 3f        | 0.844         | 0.991                | 0.99                      | 0.998         | 0.36                    | 0.175                  | 0.176              | 0.962           | 0.003         | 0.007          | 0.145                |
| 3g        | 0.806         | 0.996                | 0.99                      | 0.998         | 0.26                    | 0.233                  | 0.148              | 0.965           | 0.003         | 0.007          | 0.205                |
| 3h        | 0.64          | 0.995                | 0.988                     | 0.997         | 0.145                   | 0.44                   | 0.166              | 0.968           | 0.003         | 0.007          | 0.263                |
| 3i        | 0.69          | 0.998                | 0.989                     | 0.998         | 0.154                   | 0.394                  | 0.152              | 0.969           | 0.003         | 0.006          | 0.318                |
| 3j        | 0.741         | 0.992                | 0.991                     | 0.998         | 0.321                   | 0.236                  | 0.172              | 0.956           | 0.003         | 0.007          | 0.15                 |
| 4a        | 0.409         | 0.98                 | 0.986                     | 0.619         | 0.05                    | 0.962                  | 0.281              | 0.517           | 0.003         | 0.009          | 0.327                |
| 4b        | 0.299         | 0.982                | 0.969                     | 0.938         | 0.676                   | 0.758                  | 0.411              | 0.911           | 0.003         | 0.01           | 0.197                |
| 4c        | 0.568         | 0.984                | 0.985                     | 0.819         | 0.055                   | 0.8                    | 0.468              | 0.575           | 0.003         | 0.01           | 0.072                |
| 4d        | 0.138         | 0.99                 | 0.974                     | 0.93          | 0.053                   | 0.907                  | 0.814              | 0.942           | 0.003         | 0.011          | 0.27                 |
| 4e        | 0.458         | 0.972                | 0.979                     | 0.943         | 0.202                   | 0.527                  | 0.664              | 0.901           | 0.003         | 0.011          | 0.347                |
| 4f        | 0.135         | 0.992                | 0.959                     | 0.66          | 0.219                   | 0.307                  | 0.304              | 0.937           | 0.003         | 0.007          | 0.016                |
| 4g        | 0.084         | 0.997                | 0.939                     | 0.348         | 0.287                   | 0.177                  | 0.234              | 0.956           | 0.003         | 0.005          | 0.004                |
| 4h        | 0.476         | 0.993                | 0.983                     | 0.249         | 0.077                   | 0.365                  | 0.586              | 0.759           | 0.003         | 0.007          | 0.035                |
| 4i        | 0.505         | 0.993                | 0.946                     | 0.692         | 0.529                   | 0.841                  | 0.194              | 0.894           | 0.003         | 0.008          | 0.06                 |
| 4j        | 0.427         | 0.995                | 0.97                      | 0.754         | 0.327                   | 0.503                  | 0.209              | 0.916           | 0.003         | 0.007          | 0.039                |
| Linezolid | 0.029         | 0.971                | 0.918                     | 0.676         | 0.042                   | 0.373                  | 0.577              | 0.725           | 0.003         | 0.011          | 0.046                |
